# Supplementary material for: Structural and activity characterization of human PHPT1 after oxidative modification
Source: PubMed Central journal article supplement (PMC4817053; doi:10.1038/srep23658), 2016-04-01
Supplement: srep23658-s1.pdf [file srep23658-s1.pdf]

## **Supplemental Information**

### **Structural and activity characterization of human PHPT1 after oxidative modification**

**Daniel R. Martin, Priyanka Dutta, Shikha Mahajan, Sameer Varma and Stanley M. Stevens Jr.\***

**Department of Cell Biology, Microbiology and Molecular Biology, University of South Florida, Tampa, FL 33620**

\*corresponding author; Email: [smstevens@usf.edu](mailto:smstevens@usf.edu)

Keywords:

Oxidative stress, phosphohistidine, PHPT1, mass spectrometry, molecular dynamics

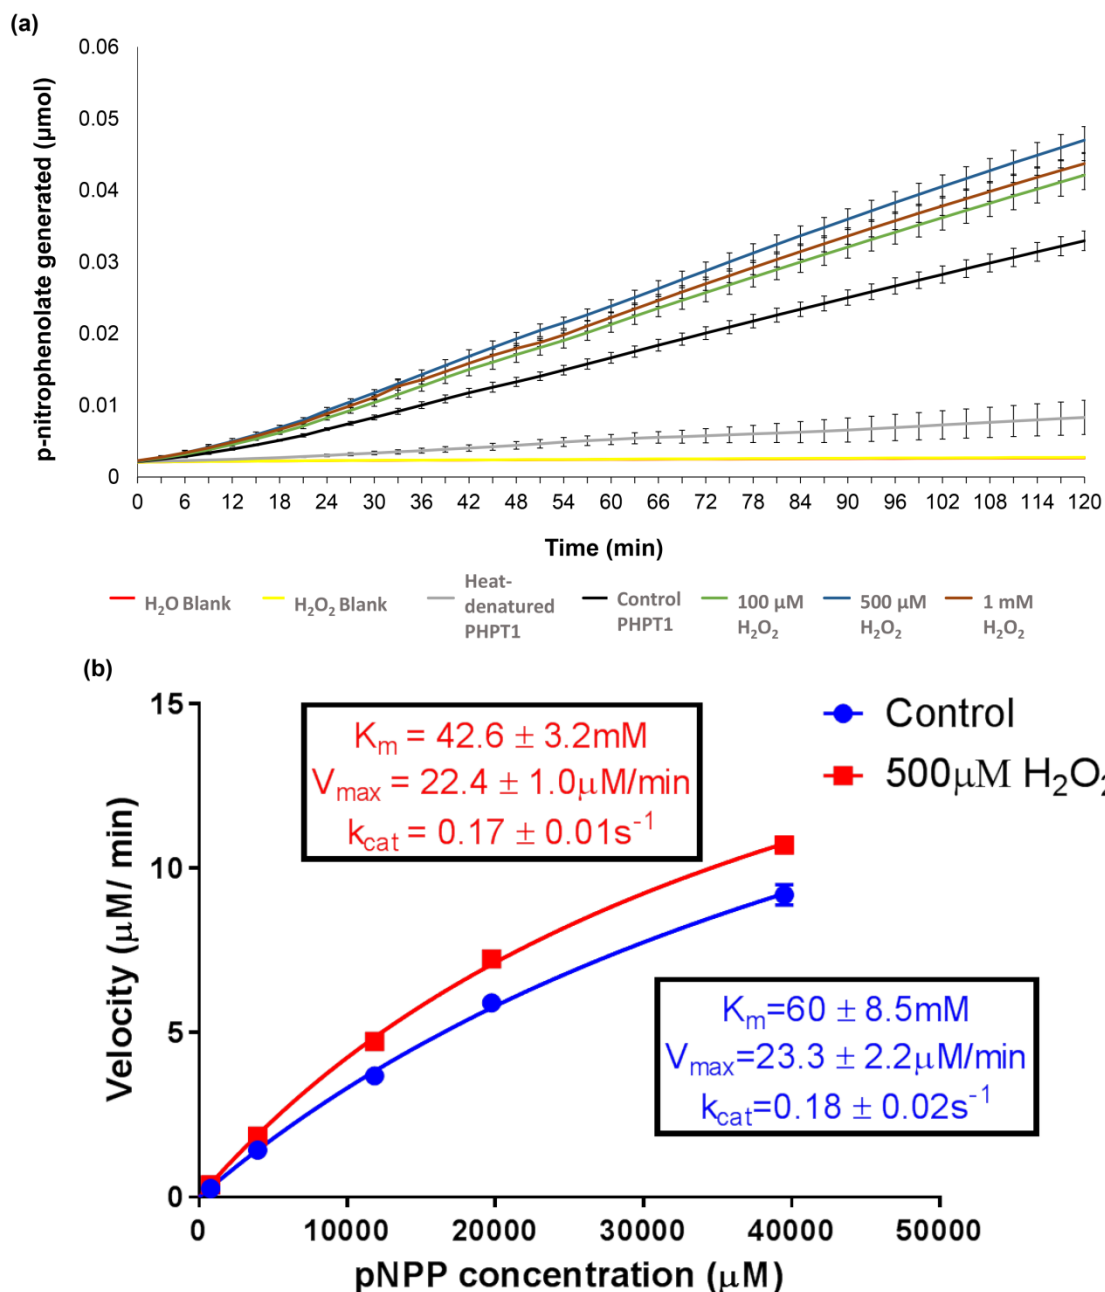

**Supplemental Figure 1.** Colorimetric phosphatase activity assay results using the p-nitrophenyl phosphate (pNPP) substrate for PHPT1 before and after H<sub>2</sub>O<sub>2</sub> treatment. **(a)** Representative colorimetric assay reading over 2 h at 5 mM initial pNPP concentration where error bars represent standard deviation. Error bars represent standard deviation of plated and technical replicates (n=9). **(b)** Nonlinear regression using the Michaelis-Menten equation was performed for control and 500 μM H<sub>2</sub>O<sub>2</sub>-treated PHPT1 with a substrate concentration range from 0.8mM-40mM.  $K_m$ ,  $V_{max}$ , and  $k_{cat}$  values are shown with error representing 95% confidence intervals.
